# Supplementary material for: Socio-Organizational Impact of Confocal Laser Endomicroscopy in Neurosurgery and Neuropathology: Results from a Process Analysis and Expert Survey
Source: MDPI journal article supplement (doi:10.3390/diagnostics11112128), 2021-11-16

Figure S1: Full BPMN model for the current process of frozen section analysis in a large German clinic for maximum care

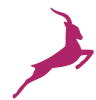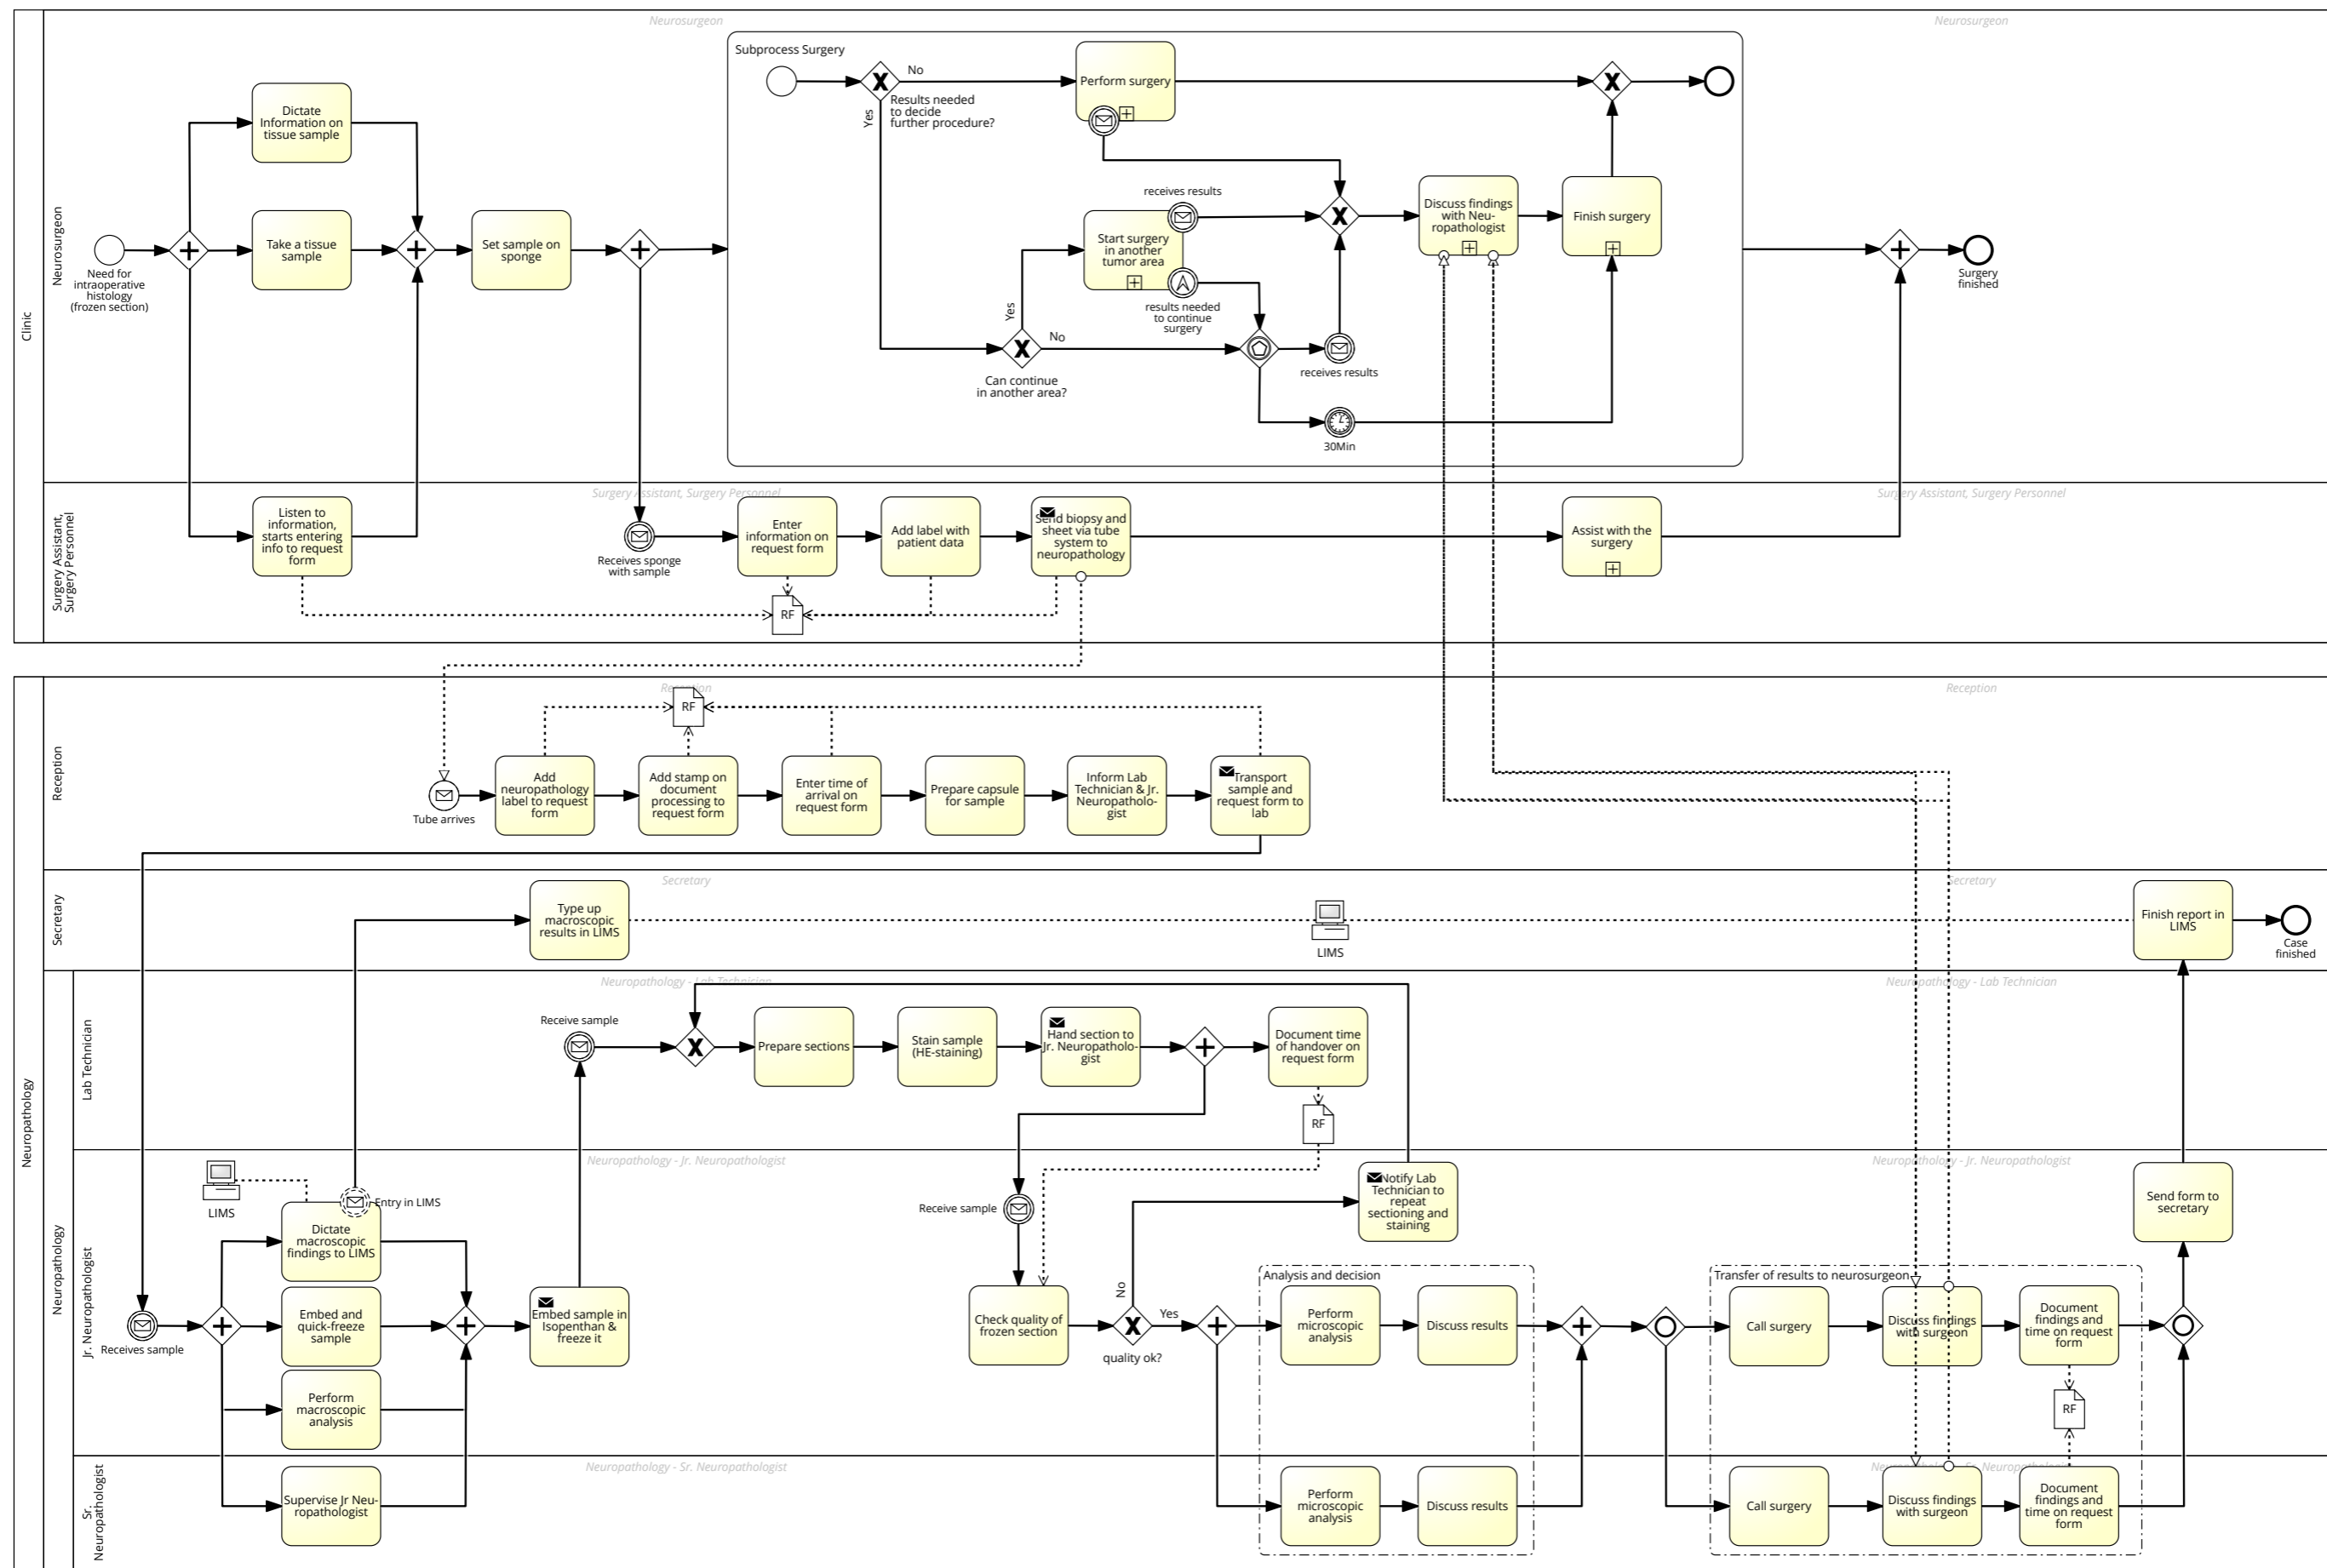

Supplement: s1 [file s1]
