# Supplementary material for: Socio-Organizational Impact of Confocal Laser Endomicroscopy in Neurosurgery and Neuropathology: Results from a Process Analysis and Expert Survey
Source: MDPI journal article supplement (doi:10.3390/diagnostics11112128), 2021-11-16
Supplement: s1 [file s1]

Figure S2: Full BPMN model for the digitized process with CLE

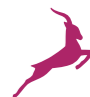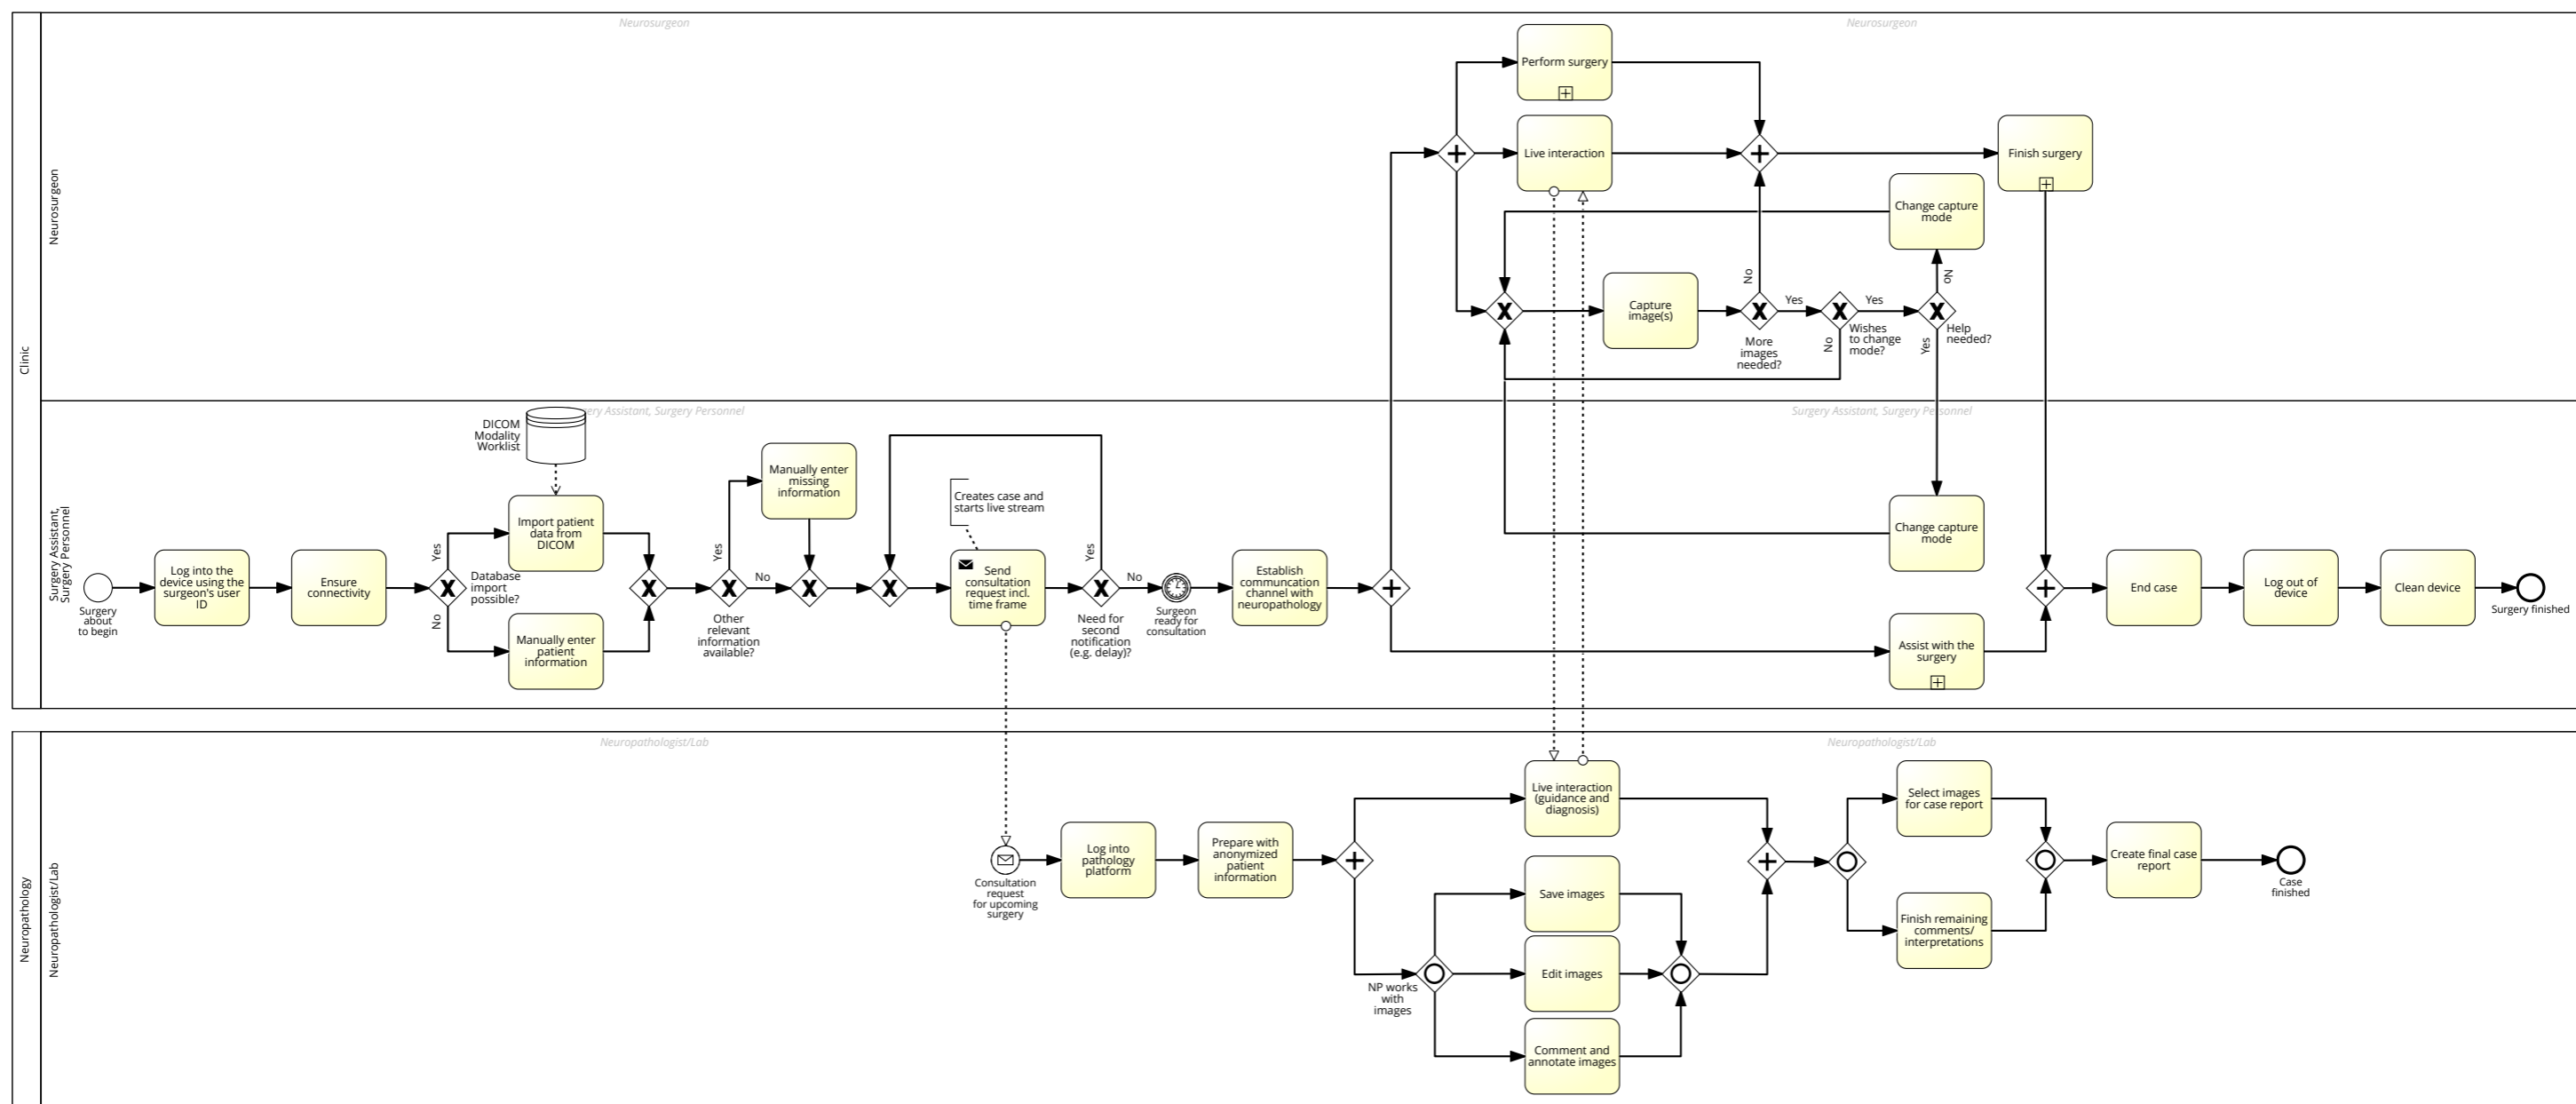

BPMN: Business Process Model and Notation  
CLE: Confocal Laser Endomicroscopy  
DICOM: Digital Imaging and Communications in Medicine (data standard for medical imaging data)
