# Supplementary material for: Socio-Organizational Impact of Confocal Laser Endomicroscopy in Neurosurgery and Neuropathology: Results from a Process Analysis and Expert Survey
Source: Diagnostics (Basel). 2021 Nov 16;11(11):2128. doi: 10.3390/diagnostics11112128 (PMC8623423; doi:10.3390/diagnostics11112128)
Supplement: Supplementary file 1 [file diagnostics-11-02128-s001.zip]

Archive with 4 entries (4 files):
- Figure S2 Full BPMN model for the digitized process with CLE.pdf
- __MACOSX/._Figure S2 Full BPMN model for the digitized process with CLE.pdf
- Figure S1 Full BPMN model for the current process of frozen section analysis in a large German clinic for maximum care.pdf
- __MACOSX/._Figure S1 Full BPMN model for the current process of frozen section analysis in a large German clinic for maximum care.pdf
